# Supplementary material
Source: publisher site journal article supplement (https://static.cambridge.org/content/id/urn:cambridge.org:id:article:S0899823X18003343/resource/name/S0899823X18003343supp001.docx)
Supplement: Supplementary file 1 [file S0899823X18003343supp001.docx]

**A Screening Strategy for Latent Tuberculosis in Healthcare Workers: Cost-effectiveness and Budget Impact of Universal versus Targeted Screening**

**Supplemental Material**

**Figure Legends**

Figure 1. Simplified decision tree for the screening of latent tuberculosis infection (LTBI) for an (a) existing and (b) new healthcare worker (HCW). CXR = Chest X-ray, HCW = Healthcare worker, INH = Isoniazid, LTBI = Latent tuberculosis infection, QFT-G = QuantiFERON-TB Gold In-Tube, TB = Tuberculosis

Figure 2. One-way sensitivity on the total 3-year budget impact of (a) No screening, (b) “New international + triennial high-risk”, (c) “New + triennial universal”, (d) “New + triennial universal + annual high-risk” and (e) “New + annual universal” screening. HCWs = Healthcare workers
